# Supplementary material
Source: PubMed Central journal article supplement (PMC3741659)
Supplement: NIHMS453359-supplement-01.pdf [file NIHMS453359-supplement-01.pdf]

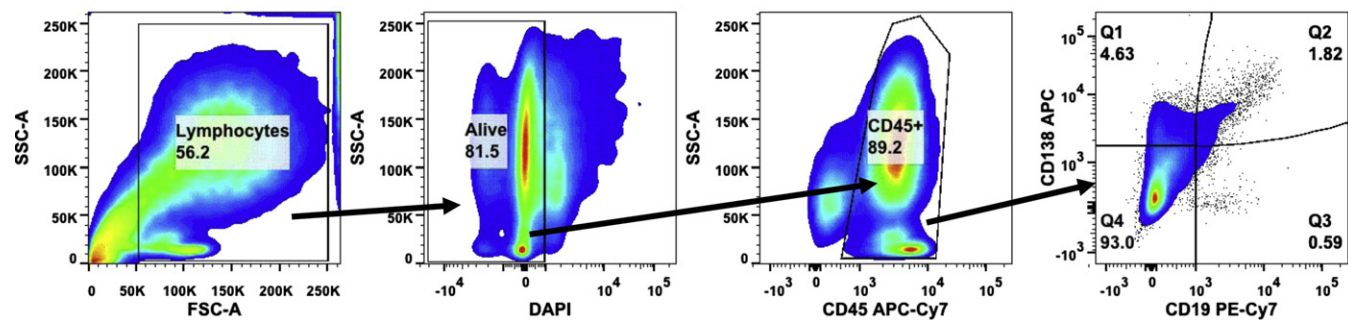

**FIG E1.** Representative gating strategy used for analysis of flow cytometric data. Debris was gated out based on forward scatter A (*FSC-A*) versus side scatter A (*SSC-A*), DAPI<sup>+</sup> dead cells were excluded, and we analyzed B lineage subsets within the CD45<sup>+</sup> gate. All gates are based on fluorescence minus one controls.

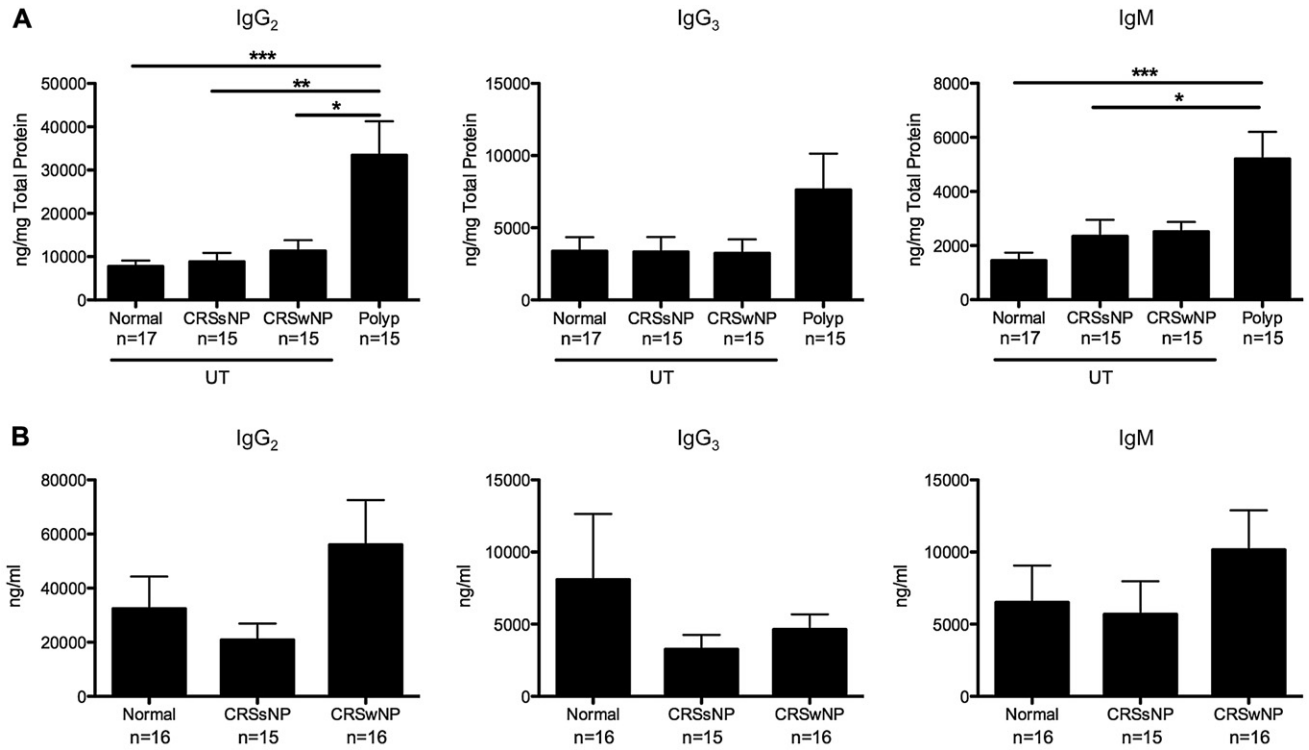

**FIG E2.** Sinus tissue antibody levels. **A**, Tissue levels of IgG<sub>2</sub>, IgG<sub>3</sub>, and IgM. **B**, Nasal lavage fluid levels of IgG<sub>2</sub>, IgG<sub>3</sub>, and IgM. Data represent means ± SEMs. \**P* < .05, \*\**P* < .01, and \*\*\**P* < .001, Kruskal-Wallis test.

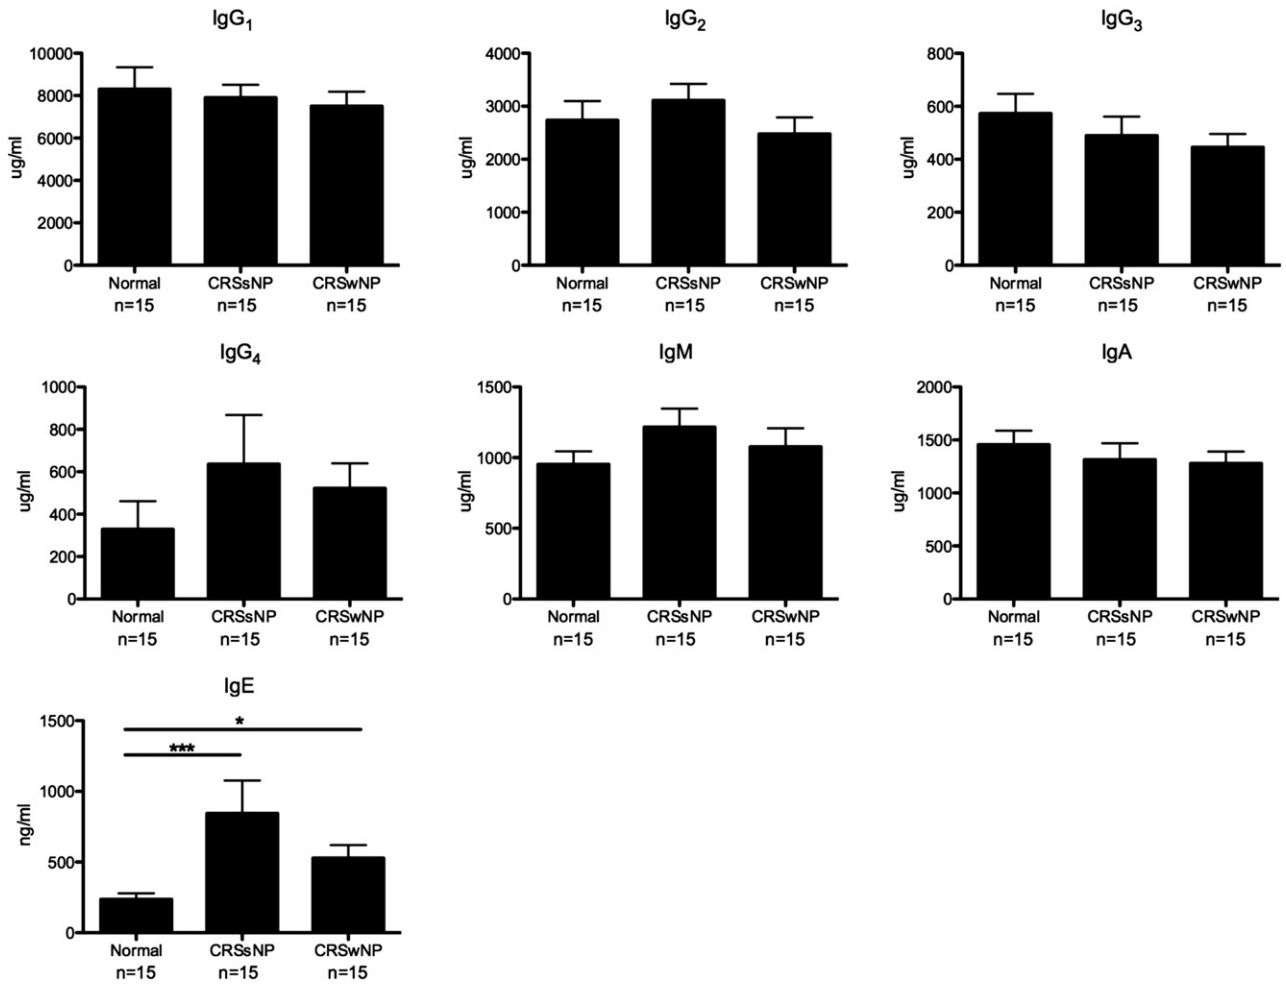

**FIG E3.** Serum antibody levels. Data represent means  $\pm$  SEMs. \* $P < .05$  and \*\*\* $P < .001$ , Kruskal-Wallis test.

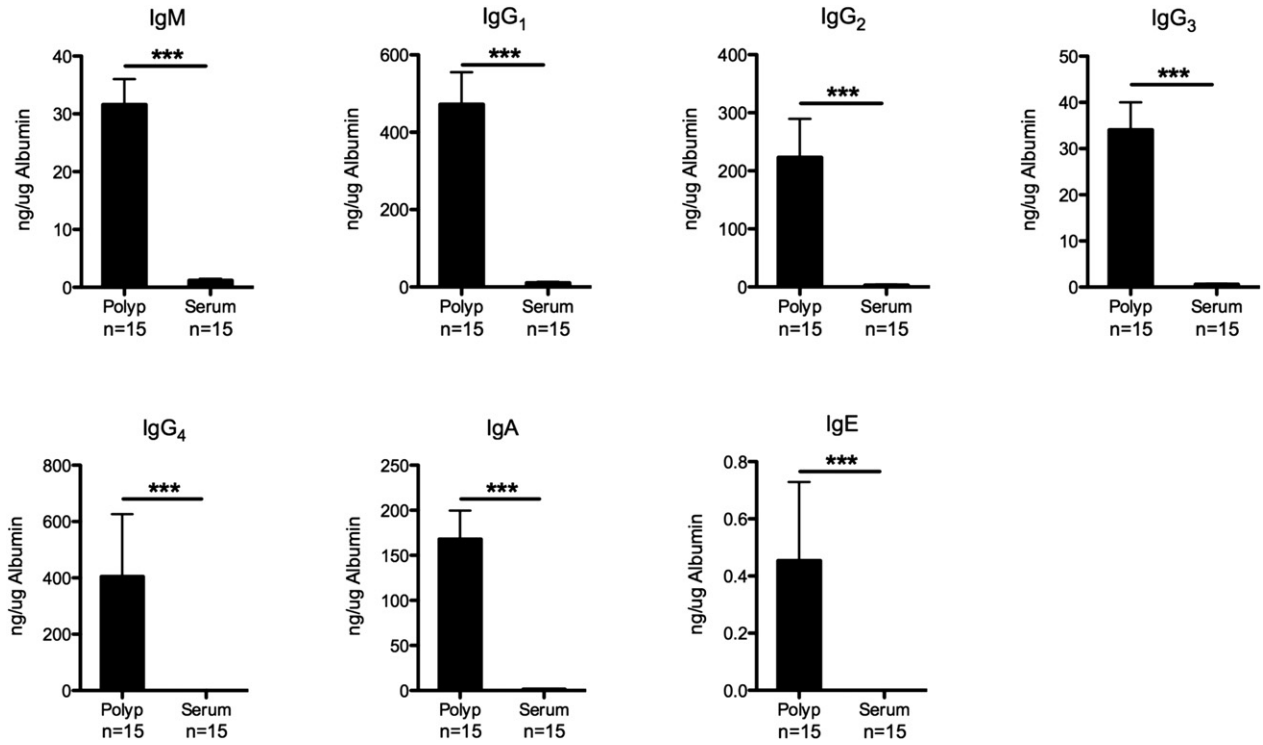

**FIG E4.** Antibody levels in NPs and sera normalized to albumin. Similar results were found for all UT compared with sera (data not shown). Data represent means  $\pm$  SEMs. \*\*\* $P < .0001$ , Mann-Whitney  $U$  test.

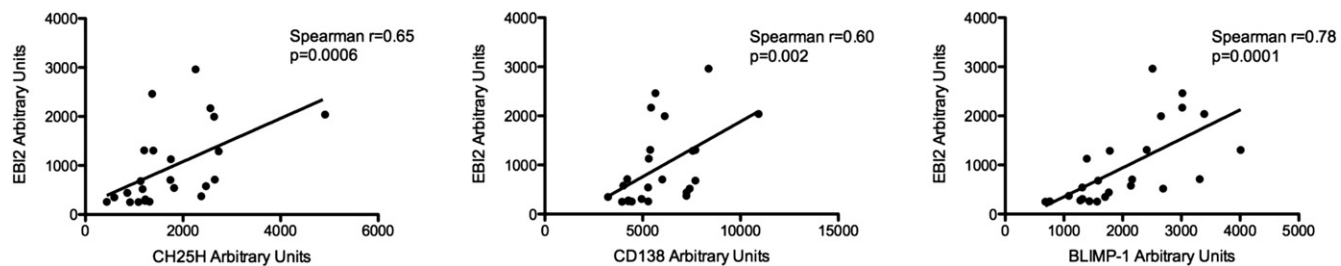

**FIG E5.** EB12 expression correlates with markers of plasma cells. Gene expression was assessed by using microarray analysis (see the [Methods](#) section in this article's Online Repository for details) and confirms gene expression data from an independent sample set assessed by using quantitative RT-PCR ( $n = 24$  in each plot). For further information, see [Fig 5](#).

**TABLE E1.** Subjects' characteristics

|                         | Control UT         |    | UT from patients with CRSsNP |    |    | UT from patients with CRSwNP* |    |    | NPs from patients with CRSwNP* |    |    |    |
|-------------------------|--------------------|----|------------------------------|----|----|-------------------------------|----|----|--------------------------------|----|----|----|
|                         | n = 41 (20 M/21 F) |    | n = 70 (30 M/40 F)           |    |    | n = 74 (51 M/23 F)            |    |    | n = 79 (57 M/22 F)             |    |    |    |
| Age (y), median (range) | 46 (16-78)         |    | 35 (19-73)                   |    |    | 41 (20-75)                    |    |    | 43 (20-75)                     |    |    |    |
|                         | Y                  | N  | U                            | Y  | N  | U                             | Y  | N  | U                              | Y  | N  | U  |
| Atopy                   | 2                  | 37 | 2                            | 38 | 20 | 12                            | 36 | 20 | 18                             | 39 | 23 | 17 |
| Asthma                  | 0                  | 41 | 0                            | 14 | 50 | 6                             | 32 | 40 | 2                              | 37 | 40 | 2  |
| Methodology used        |                    |    |                              |    |    |                               |    |    |                                |    |    |    |
| Nasal lavage fluid      | n = 21 (12 M/9 F)  |    | n = 36 (17 M/19 F)           |    |    | n = 33 (26 M/7 F)             |    |    | n = 37 (28 M/9 F)              |    |    |    |
| Age (y), median (range) | 52 (27-78)         |    | 34 (19-73)                   |    |    | 47 (26-71)                    |    |    | 47 (26-72)                     |    |    |    |
| Serum                   | n = 15 (6 M/9 F)   |    | n = 15 (8 M/7 F)             |    |    | n = 14 (5 M/9 F)              |    |    | n = 14 (10 M/4 F)              |    |    |    |
| Age (y), median (range) | 58 (37-78)         |    | 42 (32-59)                   |    |    | 44 (28-70)                    |    |    | 45 (33-70)                     |    |    |    |
| IHC                     | n = 8 (3 M/5 F)    |    | n = 8 (4 M/4 F)              |    |    | n = 9 (5 M/4 F)               |    |    | n = 8 (6 M/2 F)                |    |    |    |
| Age (y), median (range) | 39 (25-62)         |    | 35 (25-59)                   |    |    | 34 (27-64)                    |    |    | 37 (27-64)                     |    |    |    |
| Tissue extract          | n = 25 (12 M/13 F) |    | n = 44 (20 M/24 F)           |    |    | n = 44 (33 M/11 F)            |    |    | n = 48 (34 M/14 F)             |    |    |    |
| Age (y), median (range) | 52 (27-78)         |    | 34 (19-73)                   |    |    | 46 (20-75)                    |    |    | 46 (20-75)                     |    |    |    |
| Tissue RNA              | n = 16 (7 M/9 F)   |    | n = 19 (7 M/12 F)            |    |    | n = 20 (14 M/6 F)             |    |    | n = 21 (19 M/3 F)              |    |    |    |
| Age (y), median (range) | 46 (16-63)         |    | 36 (20-64)                   |    |    | 37 (25-55)                    |    |    | 39 (25-57)                     |    |    |    |
| Cell isolation          | n = 8 (5 M/3 F)    |    | n = 8 (5 M/3 F)              |    |    | n = 10 (6 M/4 F)              |    |    | n = 16 (11 M/5 F)              |    |    |    |
| Age (y), median (range) | 54 (27-62)         |    | 39 (19-61)                   |    |    | 42 (23-63)                    |    |    | 44 (23-67)                     |    |    |    |

F, Female; M, male; N, no; U, unknown; Y, yes.

\*Most patients had both UT and polyp tissues used in these studies and are represented in both groups. The total number of patients with CRSwNP included in this study was 90.
